# Supplementary material
Source: PubMed Central journal article supplement (PMC4972136)
Supplement: EMBJ-35-831-s001.pdf [file EMBJ-35-831-s001.pdf]

## **Ribonuclease H2 mutations induce a cGAS/STING-dependent innate immune response**

Karen J. Mackenzie<sup>1</sup>, Paula Carroll<sup>1</sup>, Laura Lettice<sup>1</sup>, Žygimantė Tarnauskaitė<sup>1</sup>, Kaalak Reddy<sup>1</sup>, Flora Dix<sup>1</sup>, Ailsa Revuelta<sup>1</sup>, Erika Abbondati<sup>2</sup>, Rachel E. Rigby<sup>1,3</sup>, Björn Rabe<sup>1,4</sup>, Fiona Kilanowski<sup>1</sup>, Graeme Grimes<sup>1</sup>, Adeline Fluteau<sup>1</sup>, Paul S. Devenney<sup>1</sup>, Robert E. Hill<sup>1</sup>, Martin A. M. Reijns<sup>1</sup>, Andrew P. Jackson<sup>1</sup>

1. MRC Human Genetics Unit, MRC Institute of Genetics and Molecular Medicine, The University of Edinburgh, Edinburgh, UK

2. Roslin Institute, The University of Edinburgh, Edinburgh, UK

3. MRC Human Immunology Unit, Radcliffe Department of Medicine, MRC WIMM University of Oxford, Oxford, UK

4. Institute of Biochemistry, Christian-Albrechts-University of Kiel, Kiel, Germany

Corresponding Author: [andrew.jackson@igmm.ed.ac.uk](mailto:andrew.jackson@igmm.ed.ac.uk)

### **Appendix**

Appendix Figure S1-4

Appendix Table S1-4

## Appendix Figure S1

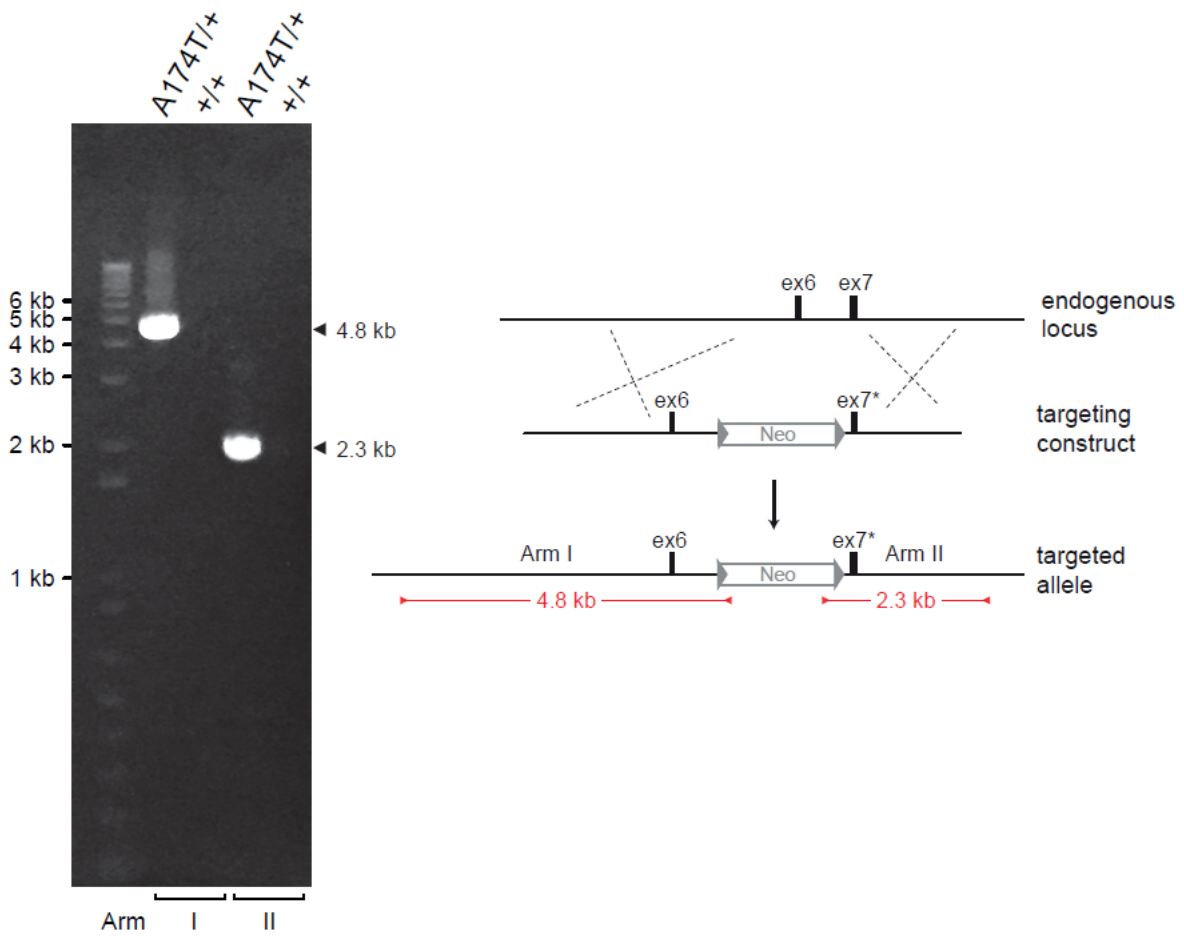

**Figure S1: Long range PCR confirms correct targeting of *Rnaseh2b* exon 7 by homologous recombination**

PCRs using primers (indicated by red triangles in the right schematic) amplified fragments of the expected sizes for *Rnaseh2b*-A174T (*A174T/+*), but not for wildtype (*+/+*) control DNA. Arm I PCR product, 4.8 kb; Arm II PCR product, 2.3 kb.

## Appendix Figure S2

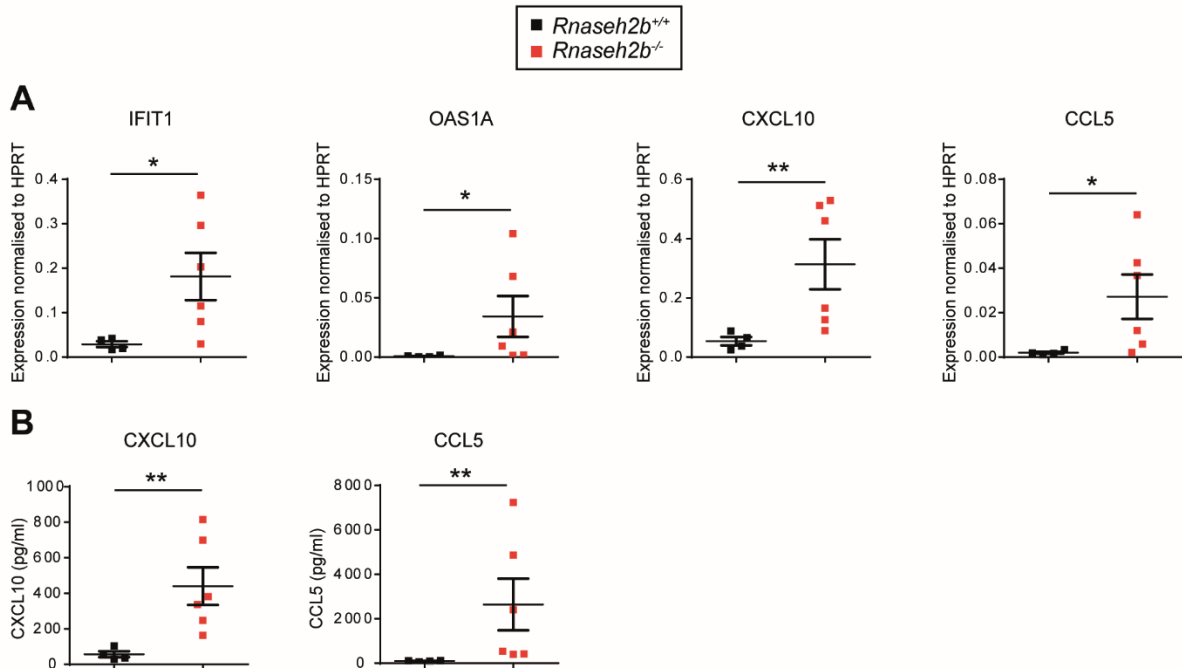

**Figure S2: ISG transcript upregulation and proinflammatory cytokine secretion varies between independent *Rnaseh2b*<sup>-/-</sup> MEFs lines**

Variation is seen in the degree of (A) ISG transcript levels and (B) secretion of proinflammatory cytokines (CXCL10 and CCL5) from independent *Rnaseh2b*<sup>-/-</sup> MEF lines. Each point represents the mean of three independent experiments for independent MEF lines; error bars, SEM, \* = p < 0.05, \*\* = p < 0.01, Mann-Whitney U test. *Rnaseh2b*<sup>-/-</sup> and control MEFs on a C57/BL6 *p53*<sup>-/-</sup> background.

## Appendix Figure S3

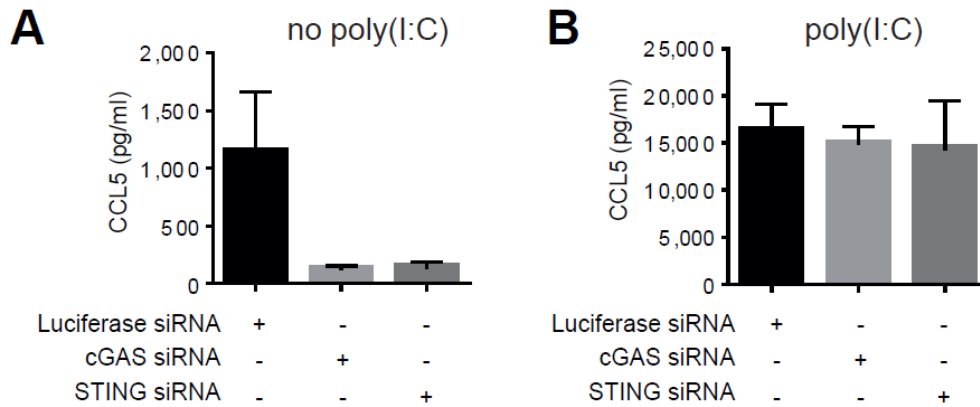

**Figure S3: siRNA knockdown of STING and cGAS in *Rnaseh2b*<sup>-/-</sup> MEFs does not affect the response to poly(I:C)**

The response to transfected HMW Poly(I:C) is maintained after siRNA knockdown of cGAS or STING. 48 h after luciferase, cGAS or STING siRNA treatment, *Rnaseh2b*<sup>-/-</sup> MEFs were further treated with (A) lipofectamine alone or (B) transfected with HMW Poly(I:C), and CCL5 assessed in culture supernatants 22 h later by ELISA. Error bars, SEM of two independent experiments.

## Appendix Figure S4

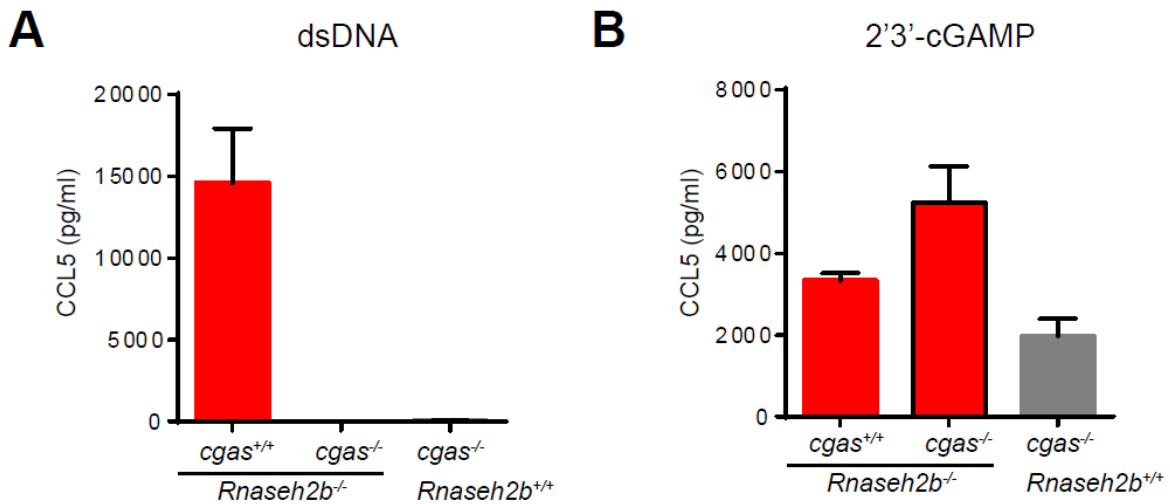

**Figure S4: *cGAS*<sup>-/-</sup> *Rnaseh2b*<sup>-/-</sup> MEFs do not produce CCL5 in response to dsDNA but remain responsive to 2'3'-cGAMP**

*cGAS*<sup>-/-</sup> *Rnaseh2b*<sup>-/-</sup> MEFs (*cGAS* deleted by CRISPR/Cas9 in *Rnaseh2b*<sup>-/-</sup> MEFs) do not produce CCL5 in response to dsDNA, in contrast to *cGAS*<sup>+/+</sup> *Rnaseh2b*<sup>-/-</sup> control MEFs, but retain 2'3'-cGAMP responsiveness. *Rnaseh2b*<sup>-/-</sup> *cGAS*<sup>-/-</sup> and *Rnaseh2b*<sup>-/-</sup> *cGAS*<sup>+/+</sup> clones were transfected with (A) dsDNA or (B) 2'3'-cGAMP. Culture supernatant was collected 24 h after transfection and the concentration of CCL5 assessed by ELISA. An independent *cGAS*<sup>-/-</sup> MEF line (derived from a *cGAS*<sup>-/-</sup> embryo) was included as a control. Two independent experiments, n=2 *Rnaseh2b*<sup>-/-</sup> *cGAS*<sup>-/-</sup> clones, n=4 *Rnaseh2b*<sup>-/-</sup> *cGAS*<sup>+/+</sup> clones, error bars, SEM of each experiment.

## Appendix Tables S1-4

Appendix Table S1 shows dataset from BeadArray transcript analysis (Illumina) referred to in Fig 3C. All upregulated transcripts comparing two *Rnaseh2b*<sup>-/-</sup> MEF lines versus 4 *Rnaseh2b*<sup>+/+</sup> MEF lines are shown. ISGs as defined in corresponding references are highlighted in yellow. Appendix Table S2-3 show the primers and oligonucleotides used in this work.

**Appendix Table S1. Illumina Microarray Transcriptome Analysis**

| SYMBOL        | ENTREZGENEID | Evidence for ISG status   | log(2)FC   | fold change | AveExpr    | t          | P.Value    | adj.P.Val   | <i>Rnaseh2b</i> <sup>-/-</sup> #1 | <i>Rnaseh2b</i> <sup>-/-</sup> #2 | Control #1  | Control #2 | Control #3 | Control #4 |
|---------------|--------------|---------------------------|------------|-------------|------------|------------|------------|-------------|-----------------------------------|-----------------------------------|-------------|------------|------------|------------|
| Ccl5          | 20304        | Schoggins et al, 2011 [2] | 3.77681029 | 13.70670879 | 7.79736004 | 10.7849125 | 4.33E-06   | 0.006728781 | 10.2567294                        | 10.14237817                       | 7.024565689 | 6.33887741 | 5.78120051 | 6.54633038 |
| Isg15         | 100038882    | Schoggins et al, 2011 [2] | 3.44364326 | 10.88027609 | 8.26035381 | 9.93033309 | 8.11E-06   | 0.008015943 | 11.21396774                       | 9.982666454                       | 6.79290544  | 7.4762559  | 6.9844992  | 7.3650348  |
| Ifi2712a      | 76933        | Schoggins et al, 2011 [2] | 3.33502892 | 10.09122153 | 6.11720643 | 10.3210388 | 6.05E-06   | 0.007009813 | 8.145752018                       | 8.632990244                       | 5.378069126 | 4.80046637 | 5.46594371 | 4.57288966 |
| Usp18         | 24110        | Schoggins et al, 2011 [2] | 2.84987731 | 7.209390594 | 6.18548829 | 10.9372326 | 3.89E-06   | 0.006728781 | 8.578706575                       | 7.910369988                       | 5.607778506 | 5.03496488 | 5.26477034 | 5.67113015 |
| Oas1g         | 23960        | Schoggins et al, 2011 [2] | 2.54485847 | 5.835508878 | 5.2729193  | 14.3679447 | 4.70E-07   | 0.002084547 | 7.466531463                       | 6.875939519                       | 4.758433352 | 4.52461259 | 4.63887516 | 4.58358698 |
| Myl7          | 17898        |                           | 2.48091819 | 5.582526495 | 5.26257121 | 14.0020849 | 5.75E-07   | 0.002084547 | 7.261668079                       | 6.81505084                        | 4.82268576  | 4.48335505 | 4.39495773 | 4.52876653 |
| Apol9a        | 223672       | Sun et al, 2015           | 2.40297361 | 5.288921665 | 6.38457299 | 10.3125808 | 6.09E-06   | 0.007009813 | 8.643231501                       | 7.712383409                       | 5.718020969 | 5.80859257 | 5.74201012 | 5.83071172 |
| Chn2          | 69993        |                           | 2.28611858 | 4.877421266 | 5.82551691 | 9.38349678 | 1.24E-05   | 0.009722625 | 7.340319022                       | 6.563077451                       | 4.940267328 | 4.68407129 | 4.41795569 | 4.6200243  |
| Bst2          | 69550        | Schoggins et al, 2011 [2] | 2.24727558 | 4.747854025 | 8.11661268 | 9.58874859 | 1.06E-05   | 0.009566606 | 10.01951562                       | 9.180617919                       | 7.181560275 | 7.20740045 | 7.48086238 | 7.54134166 |
| H2-D1         | 14964        | Saleiro et al, 2015       | 2.20523508 | 4.611496731 | 8.55452115 | 11.5027462 | 2.64E-06   | 0.0057498   | 9.998760218                       | 10.11812226                       | 8.221696368 | 7.83893839 | 7.70932455 | 7.64286535 |
| Ifit3         | 15959        | Schoggins et al, 2011 [2] | 2.08573891 | 4.244924552 | 6.08444456 | 6.46543957 | 0.00018373 | 0.045469812 | 8.241978828                       | 6.973972282                       | 5.845544717 | 5.45930925 | 5.2451995  | 5.5388931  |
| Gm8909        | 667977       |                           | 2.04485955 | 4.126330995 | 6.69520225 | 10.2359055 | 6.45E-06   | 0.007009813 | 8.082740104                       | 8.170426474                       | 5.823254523 | 5.80989004 | 6.29871695 | 6.39503344 |
| Lgals3bp      | 19039        | Saleiro et al, 2015       | 2.03821266 | 4.107363584 | 8.73501132 | 8.36426731 | 2.92E-05   | 0.017616209 | 10.43163001                       | 10.02620888                       | 8.723203363 | 7.88919706 | 8.04626943 | 8.10415729 |
| Oas12         | 23962        | Schoggins et al, 2011 [2] | 2.03347596 | 4.09390029  | 6.35160204 | 6.79763058 | 0.00012958 | 0.038734695 | 8.326417946                       | 7.202208409                       | 5.595446825 | 5.94334825 | 5.43459934 | 5.94995444 |
| Dusp4         | 319520       |                           | 1.95966389 | 3.88971349  | 7.04380334 | 6.56125539 | 0.00016591 | 0.045108079 | 8.08167466                        | 7.964163522                       | 6.840282243 | 5.81804864 | 5.70540646 | 5.88928345 |
| Dcn           | 13179        |                           | 1.91513373 | 3.771487728 | 10.5404251 | 7.36008567 | 7.38E-05   | 0.030853791 | 11.22576902                       | 11.75749582                       | 9.930967183 | 9.88186966 | 9.17731645 | 9.31584146 |
| Apol9b        | 71898        | Sun et al, 2015           | 1.90879413 | 3.754951119 | 5.52378156 | 7.89007922 | 4.47E-05   | 0.020620537 | 7.396226181                       | 6.624659854                       | 5.306776107 | 4.76570422 | 5.24633615 | 5.08777909 |
| Gdf15         | 23886        |                           | 1.90143961 | 3.735857976 | 5.75108259 | 13.467195  | 7.79E-07   | 0.002119196 | 6.963752112                       | 7.084805328                       | 5.204486565 | 5.01012735 | 5.08028632 | 5.19645621 |
| Chchd10       | 103172       |                           | 1.82321233 | 3.53868251  | 8.04504032 | 8.08532935 | 3.74E-05   | 0.018811913 | 8.942755813                       | 9.568137921                       | 7.758067023 | 7.38791155 | 7.22180435 | 7.36115522 |
| Cxcl10        | 15945        | Schoggins et al, 2011 [2] | 1.81706614 | 3.523639026 | 5.34372106 | 6.78620767 | 0.00013112 | 0.038734695 | 6.99392446                        | 5.984103378                       | 4.894867259 | 4.6441326  | 4.45177231 | 4.69701896 |
| Hs3st1        | 15476        |                           | 1.7033674  | 3.256601969 | 8.86806737 | 6.93714752 | 0.00011232 | 0.038734695 | 9.616742468                       | 9.746646806                       | 7.906486432 | 8.37034445 | 7.8223703  | 7.81410776 |
| Trim30a       | 20128        | Sistigu et al, 2014       | 1.64110739 | 3.119051525 | 5.19078876 | 6.69291747 | 0.00014446 | 0.040283256 | 6.849307975                       | 5.987747501                       | 4.850162585 | 4.71674606 | 4.56418781 | 4.97858496 |
| Psmb9         | 16912        | Schoggins et al, 2011 [2] | 1.47624149 | 2.782229619 | 5.31422216 | 9.25806549 | 1.37E-05   | 0.009956497 | 6.316267493                       | 6.385606611                       | 5.142026292 | 4.6918514  | 4.9518005  | 4.71310406 |
| Btc           | 12223        |                           | 1.43634845 | 2.706350033 | 5.34716966 | 8.42371949 | 2.77E-05   | 0.017616209 | 6.500106299                       | 5.968776423                       | 4.739305721 | 4.87016532 | 4.68116466 | 4.90173596 |
| Samd9l        | 209086       | Schoggins et al, 2011 [2] | 1.33387322 | 2.520785262 | 9.14455141 | 6.88833575 | 0.00011806 | 0.038734695 | 10.25210731                       | 9.847759979                       | 8.986765627 | 8.70784622 | 8.72552794 | 8.4441019  |
| 4930486L24Rik | 214639       |                           | 1.25743945 | 2.390710524 | 5.57544641 | 8.06559716 | 3.81E-05   | 0.018811913 | 6.46684691                        | 6.528389831                       | 5.267300299 | 5.29956095 | 5.38127427 | 5.01258015 |
| Igtp          | 16145        | Saleiro et al, 2015       | 1.25343108 | 2.384077409 | 6.91426671 | 6.82137625 | 0.00012645 | 0.038734695 | 8.112594778                       | 7.564542696                       | 6.518792003 | 6.57777454 | 6.52721796 | 6.71676614 |
| Heph          | 15203        |                           | 1.11434501 | 2.164966969 | 5.06080761 | 6.46426051 | 0.00018397 | 0.045469812 | 5.769112718                       | 5.807277293                       | 4.83688968  | 4.65930966 | 4.56944415 | 4.62975648 |
| Abcc3         | 76408        |                           | 0.92914134 | 1.904142354 | 5.02796371 | 7.32130413 | 7.66E-05   | 0.030853791 | 5.734208849                       | 5.554228423                       | 4.644271761 | 4.66235145 | 4.77949363 | 4.77419235 |

**References:**

Saleiro D, Mehrotra S, Kroczyńska B, Beauchamp EM, Lisowski P, Majchrzak-Kita B, Bhagat TD, Stein BL, McMahon B, Altman JK, Kosciuzuk EM, Baker DP, Jie C, Jafari N, Thompson CB, Levine RL, Fish EN, Verma AK, Platanias LC (2015) Central role of ULK1 in type I interferon signaling. Cell Rep 11: 605-617

Schoggins JW, Wilson SJ, Panis M, Murphy MY, Jones CT, Bieniasz P, Rice CM (2011) A diverse range of gene products are effectors of the type I interferon antiviral response. Nature 472: 481-485

Sistigu A, Yamazaki T, Vacchelli E, Chaba K, Enot DP, Adam J, Vitale I, Goubar A, Baracco EE, Remedios C, Fend L, Hannani D, Aymeric L, Ma Y, Niso-Santano M, Kepp O, Schultze JL, Tuting T, Belardelli F, Bracci L et al. (2014) Cancer cell-autonomous contribution of type I interferon signaling to the efficacy of chemotherapy. Nat Med 20: 1301-1309

Sun L, Miyoshi H, Origanti S, Nice TJ, Barger AC, Manieri NA, Fogel LA, French AR, Piwnica-Worms D, Piwnica-Worms H, Virgin HW, Lenschow DJ, Stappenbeck TS (2015) Type I interferons link viral infection to enhanced epithelial turnover and repair. Cell Host Microbe 17: 85-97

**Appendix Table S2. Genotyping primer sequences**

| Genotype                           | Oligonucleotide sequences                                              | Product sizes                 |
|------------------------------------|------------------------------------------------------------------------|-------------------------------|
| <i>Rnaseh2b</i> <sup>A174T/+</sup> | GATAGCTGACAAAGATAACTC<br>CTGTCCATCTGCACGAGACT<br>CCTGGAAACCTGACCACC    | A174T = 460 bp<br>WT = 221 bp |
| <i>Rnasehb</i> <sup>tm1d/+</sup>   | GAGCCAGCTGAGGACTCAAG<br>TGAAGTATGGCGAGCTCAG<br>GCTATGACAGCTTGTCTGTC    | tm1d = 348 bp<br>WT = 307 bp  |
| <i>Trp53</i> <sup>tm1Tyj/+</sup>   | ACAGCGTGGTGGTACCTTAT<br>CTATCAGGACATAGCGTTGG<br>TATACTCAGAGCCGGCCT     | KO = 650 bp<br>WT = 450 bp    |
| <i>Sting/Mpys</i> <sup>+/-</sup>   | CATTCTAATCCAGAGGTGGGAG<br>TTTCATCTGCCTTCCAGGTC<br>GCCTTCTTGACGAGTTCTTC | KO ~ 800 bp<br>WT ~ 450 bp    |

**Appendix Table S3. Quantitative RT-qPCR primer sequences**

| Name                  | Forward sequence            | Reverse sequence       |
|-----------------------|-----------------------------|------------------------|
| Mouse IFIT1           | TCTAAACAGGGCCTTGCAG         | GCAGAGCCCTTTTTGATAATGT |
| Mouse IFIT3           | TGAACTGCTCAGCCCACA          | TCCCGGTTGACCTCACTC     |
| Mouse CXCL10          | ATGACGGGCCAGTGAGAATG        | ATTCCGGATTTCAGACATCTCT |
| Mouse OAS1A           | GCTGCCAGCCTTTGATGT          | TGGCATAGATTCTGGGATCA   |
| Mouse IFI44           | CTGATTACAAAAGAAGACATGACAGAC | AGGCAAAACCAAAGACTCCA   |
| Mouse CCL5            | ACGTCAAGGAGTATTTCTACAC      | GATGTATTCTTGAACCCACT   |
| Mouse cGAS (Mb21d1)   | GTTCAAACACAAGAAATGCAC TG    | GCTGACGGAGTACACAATCCT  |
| Mouse STING (Tmem173) | TGAAAGGCTCTTCATTGTCTCTT     | TGGCATCTTCTGCTTCCTAGA  |
| Mouse HPRT            | CTGGTGAAAAGGACCTCTCG        | CAAGGGCATATCCAACAACA   |

**Appendix Table S4. siRNA oligonucleotide sequences**

| Name                    | Target sequence                                                                        |
|-------------------------|----------------------------------------------------------------------------------------|
| Mouse sicGAS (Mb21d1)   | GGAUUGAGCUACAAGAAUA<br>AGAAAUCUCUGUGGAUUA<br>GAAGAUCCGCGUAGAAGGA<br>GCUAAGAAGCCGUCGCGA |
| Mouse siSTING (Tmem173) | GCAUCAAGAAUCGGGUUUA<br>AACAUUCGAUCCGAGAU<br>CAAAUCACACUCUGAAGUA<br>CGAAAUAACUGCCGCCUCA |
| siLUC                   | CUUACGCUGAGUACUUCGA                                                                    |
