# Supplementary material
Source: PubMed Central journal article supplement (PMC4972136)

# Source Data Figure 1

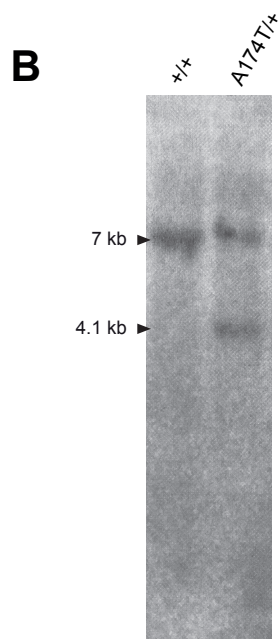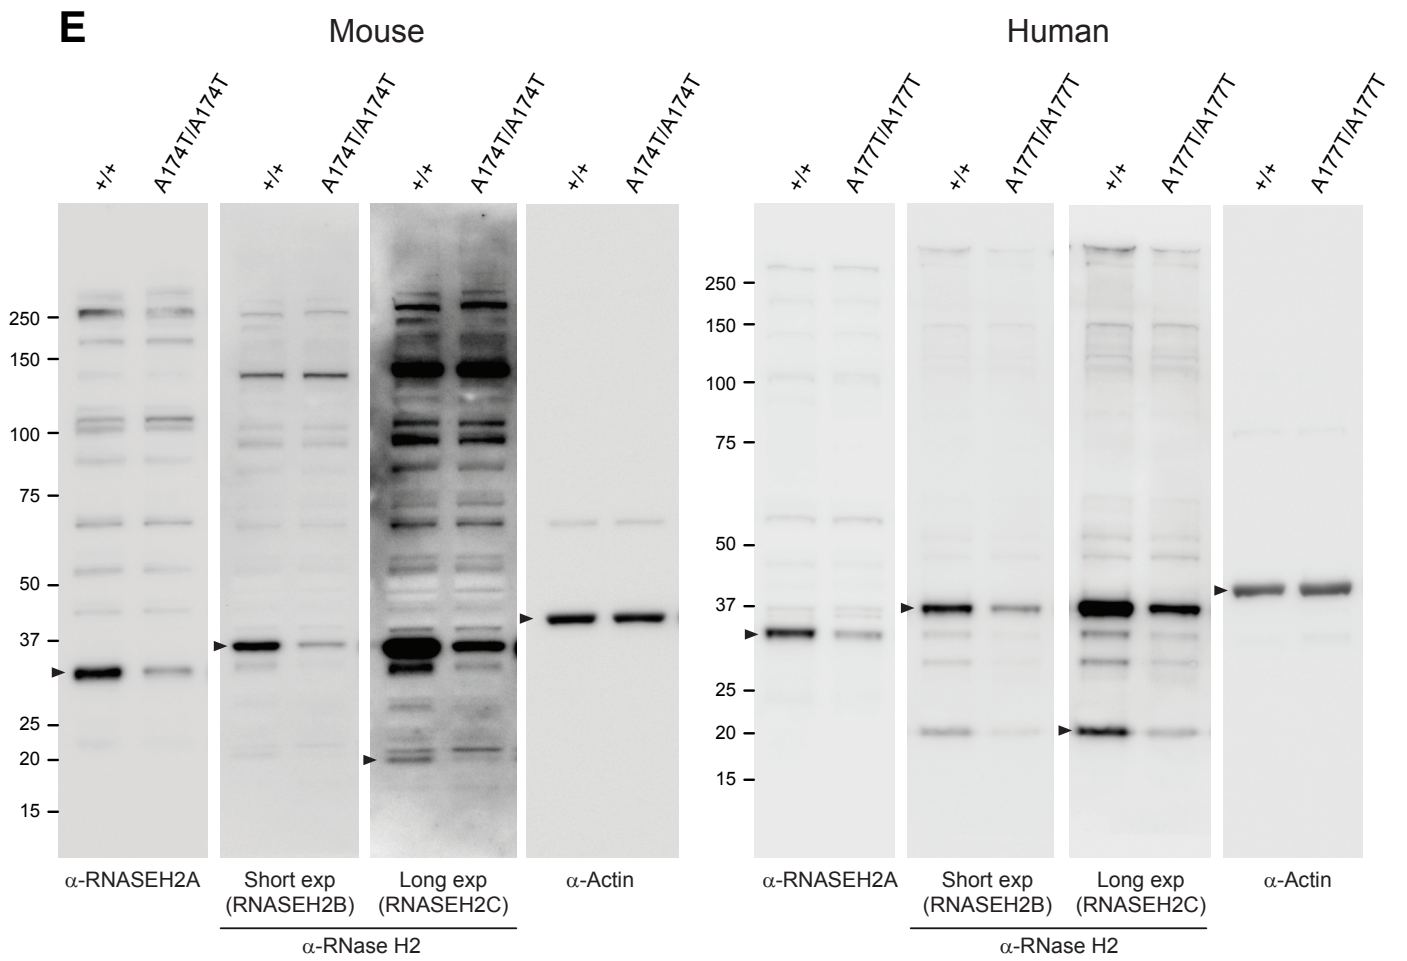

Supplement: EMBJ-35-831-s002.pdf [file EMBJ-35-831-s002.pdf]
